# Supplementary material
Source: PubMed Central journal article supplement (PMC2140107)

**A**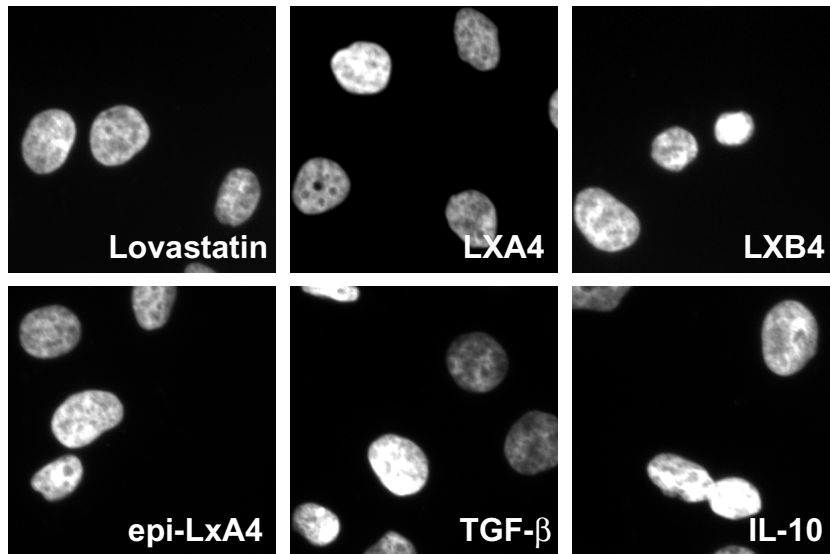**B**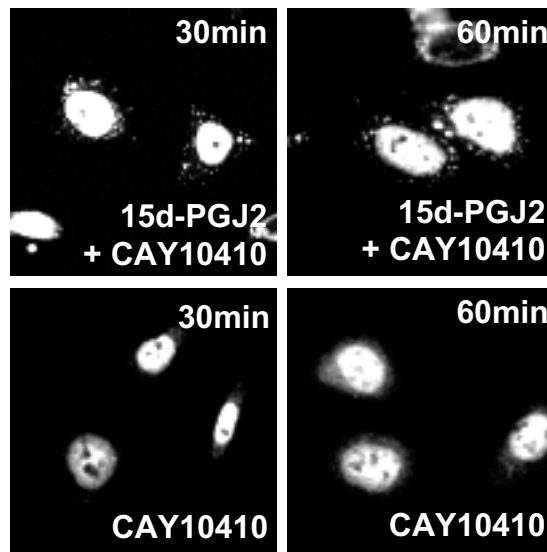**C**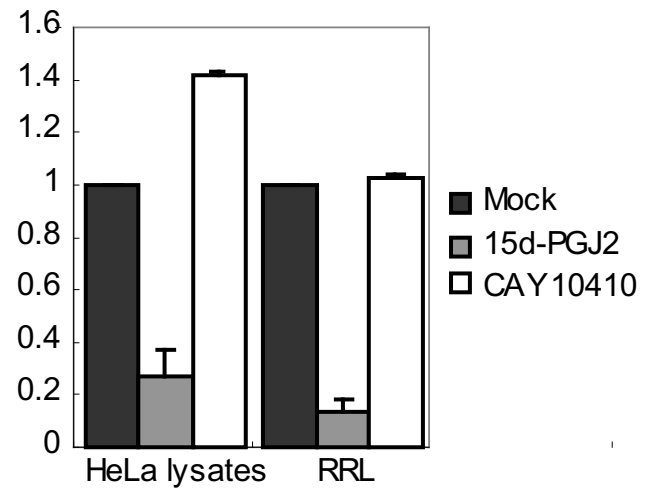**D**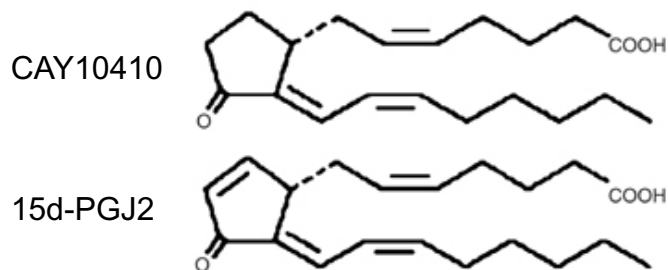

**Fig. S1. Kim, et al.**

Supplement: 7601920s1.pdf [file 7601920s1.pdf]

**A**

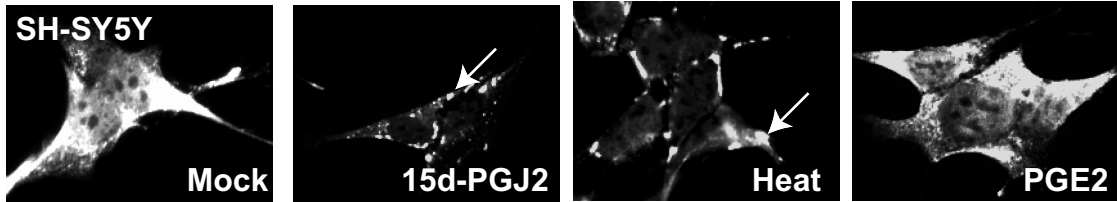

**B**

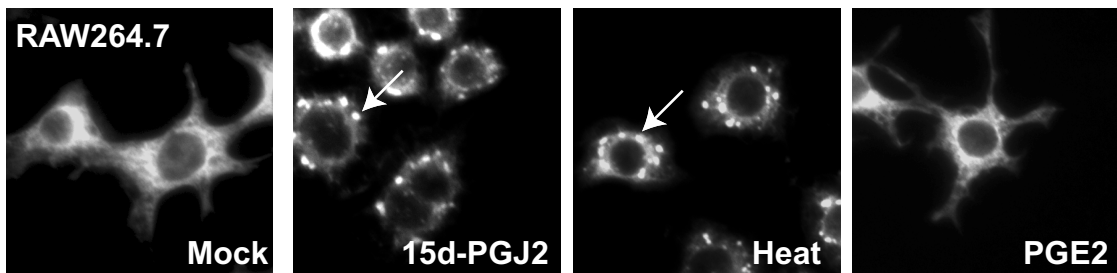

**C**

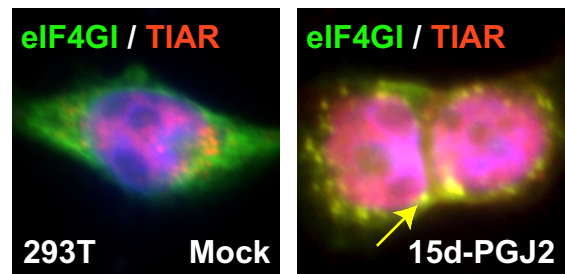

*Fig. S2. Kim, et al.*

Supplement: 7601920s2.pdf [file 7601920s2.pdf]

**A**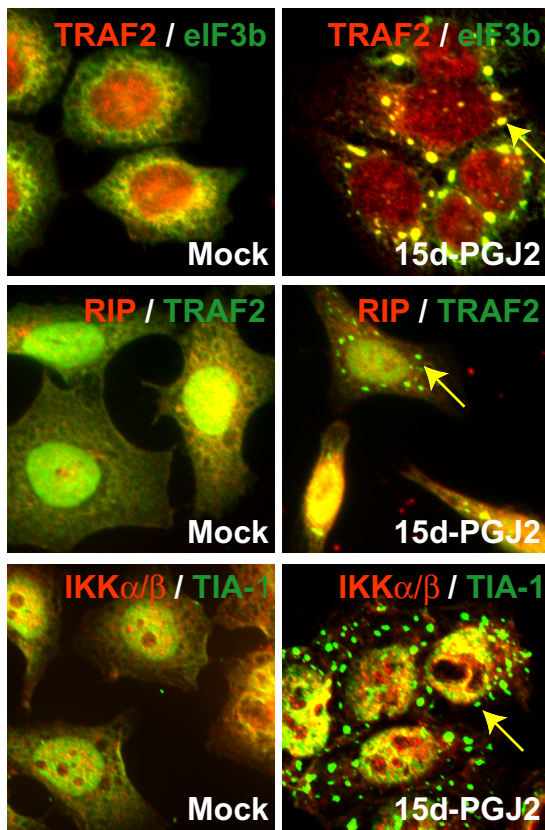**B**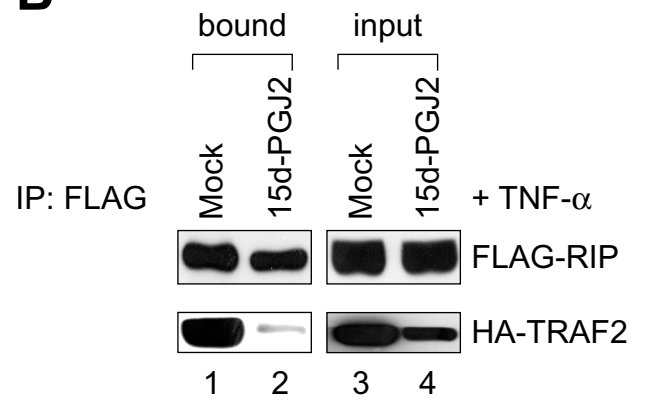

**Fig. S3. Kim, et al.**

Supplement: 7601920s3.pdf [file 7601920s3.pdf]

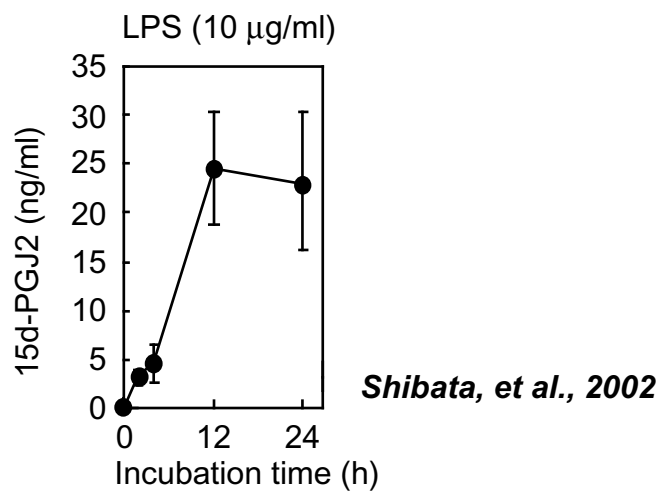

***Fig. S4, Kim et al.***

Supplement: 7601920s4.pdf [file 7601920s4.pdf]

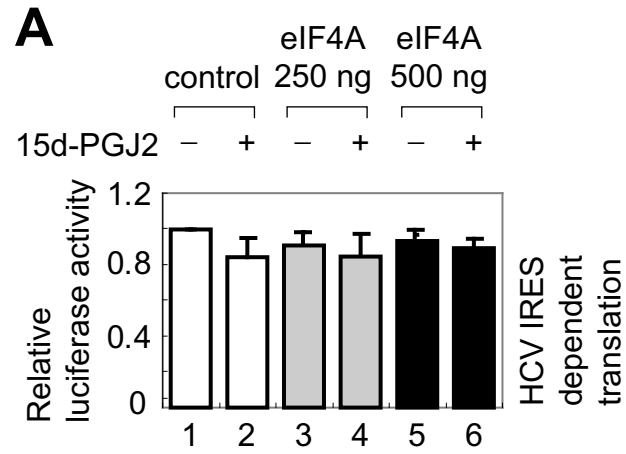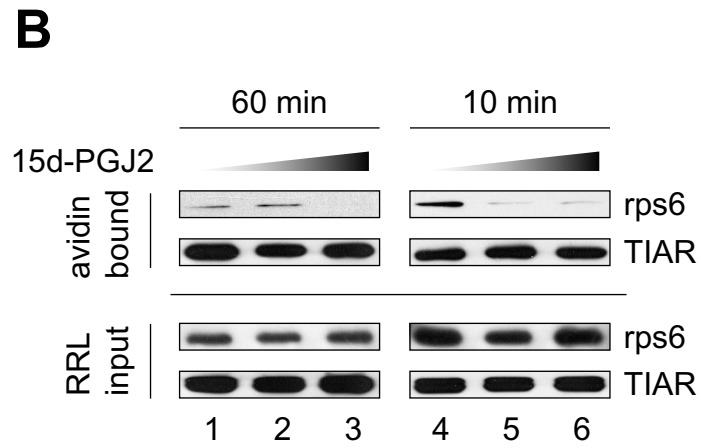

**Fig. S5. Kim, et al.**

Supplement: 7601920s5.pdf [file 7601920s5.pdf]
